# Supplementary material for: Effectiveness of Mechanical Horse-Riding Simulator-Based Interventions in Patients with Cerebral Palsy—A Systematic Review and Meta-Analysis
Source: MDPI journal article supplement (doi:10.3390/bioengineering9120790), 2022-12-11
Supplement: s1 [file s1]

## SUPPLEMENTARY FILES

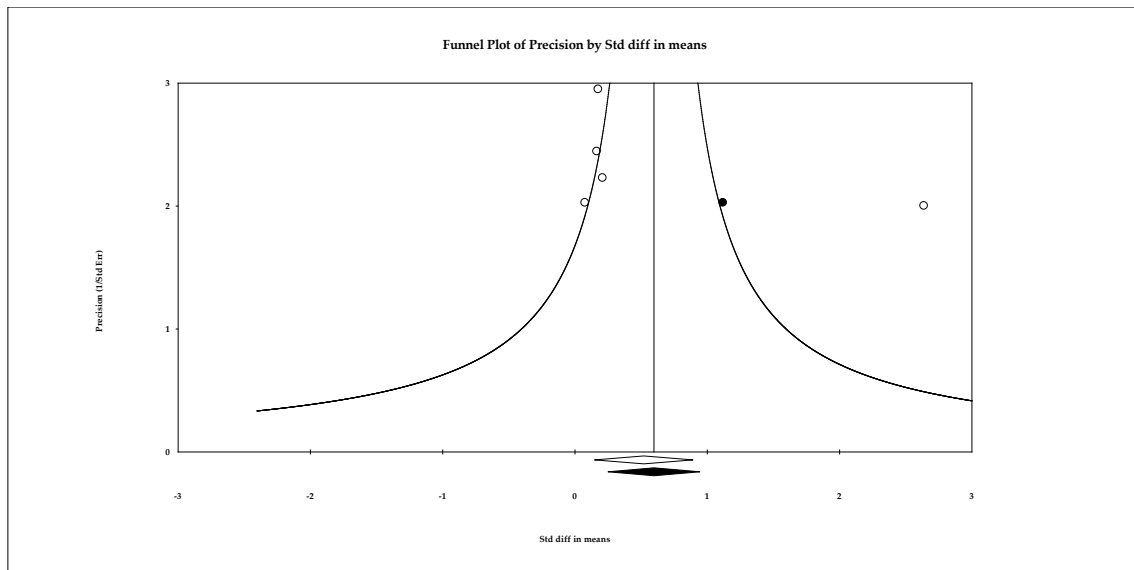

**Figure S1.** Funnel plot for Gross Motor Function, Dimension B (overall meta-analysis).

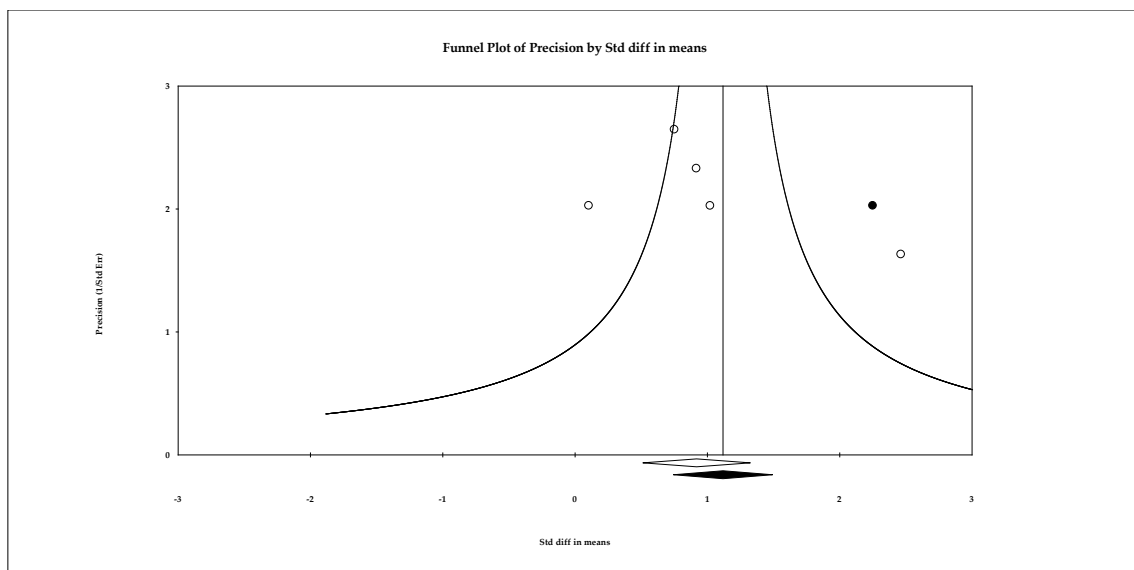

**Figure S2.** Funnel plot for Gross Motor Function, Total score (HRS + PT vs PT meta-analysis).

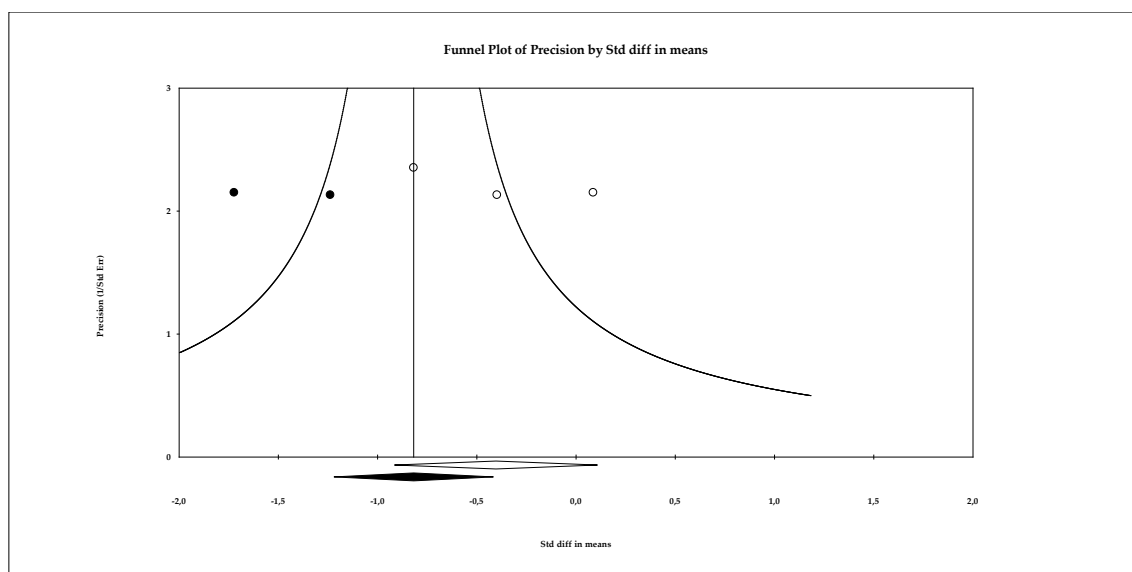

**Figure S3.** Funnel plot for Spasticity hip adductors (overall meta-analysis).
